# Supplementary figures and images for: Posterior dislocation and early retrieval of a Descemet stripping automated endothelial keratoplasty graft
Source: Research Square preprint supplement (doi:10.21203/rs.3.rs-6432693/v1), 2025-06-18

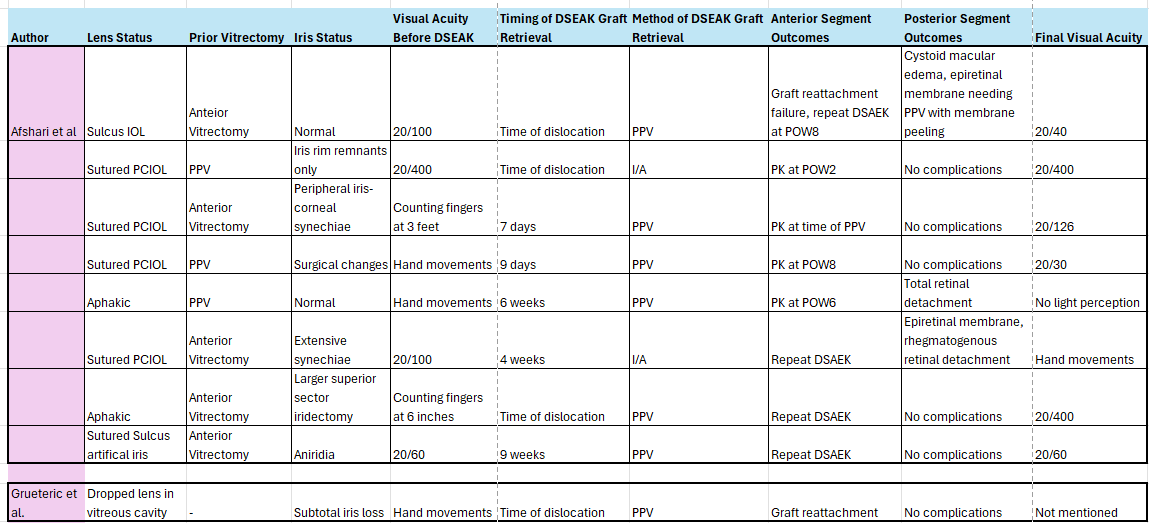


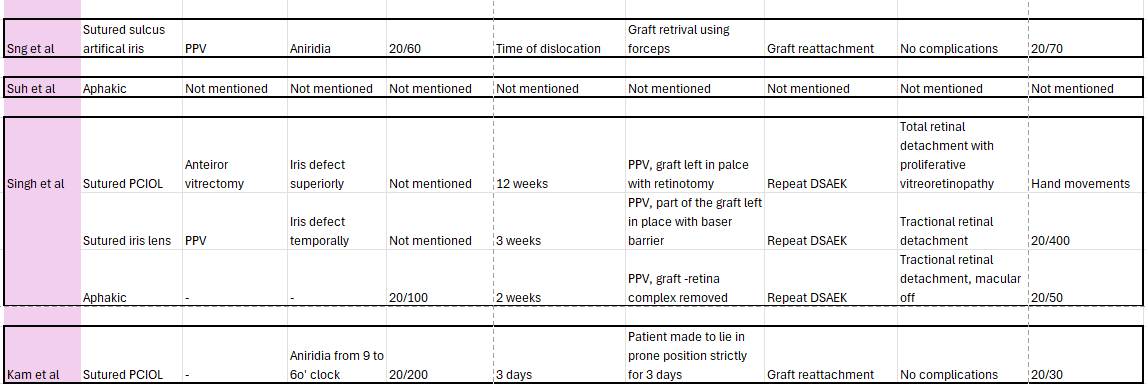

Supplement: Supplementary file 1 [file 336f31f6485f8b2ae90b2e3a.docx]
